# Supplementary material
Source: MDPI journal article supplement (https://www.mdpi.com/2073-4352/8/1/6)
Supplement: s1 [file s1]

# **Solvent dependent disorder in M2(BzOip)2(H*2*O)·solvate (M = Co or Zn) Supporting Materials**

**Laura J. McCormick1,2*, Samuel A. Morris2,3, Simon J. Teat1, Alexandra M. Z. Slawin2 and Russell E. Morris2**

1 Advanced Light Source, Lawrence Berkeley National Laboratory, Berkeley,CA 94720, USA

2 School of Chemistry, University of St Andrews, North Haugh, St Andrews, Fife KY16 9ST, UK

3 Facility for Analysis, Characterisation, Testing and Simulation, Nanyang Technological University, Singapore, 639798, Singapore

[S1. Selected bond lengths and angles 2](#_Toc500159900)

[Zn2(BzOip)2(H2O) 2](#_Toc500159901)

[Co2(BzOip)2(H2O) from MeOH 5](#_Toc500159902)

[Co2(BzOip)2(H2O) from EtOH 10](#_Toc500159903)

[Co2(BzOip)2(H2O) from iPrOH 15](#_Toc500159904)

[S2. PXRD Comparisons 20](#_Toc500159905)

[S3. TGA 23](#_Toc500159906)

## **S1. Selected bond lengths and angles**

### Zn2(BzOip)2(H2O)

**Table S1.** Bond lengths [Å] and angles [°] for Zn2(BzOip)2(H2O)·0.22MeOH·0.23H2O.

O(1)-Zn1 1.9550(19)

O(2)-Zn2I 2.0161(19)

O(1W)-Zn2 2.031(2)

O(3)-Zn1II 1.963(2)

O(4)-Zn2III 2.0480(19)

O(6)-Zn1 1.961(2)

O(7)-Zn2I 2.0028(19)

O(8)-Zn2 1.978(2)

O(9)-Zn1IV 1.9456(19)

Zn1-O(9)I 1.946(2)

Zn1-O(4)V 2.888(2)

Zn2-O(7)IV 2.0029(19)

Zn2-O(2)IV 2.0162(19)

Zn2-O(4)VI 2.048(2)

Zn2-O(9)VII 3.267(2)

O(9)I-Zn1-O(1) 117.68(9)

O(9)I-Zn1-O(6) 107.30(9)

O(1)-Zn1-O(6) 115.78(9)

O(9)I-Zn1-O(3)V 108.15(9)

O(1)-Zn1-O(3)V 109.57(9)

O(6)-Zn1-O(3)V 96.01(9)

O(9)I-Zn1-O(4)V 86.74(8)

O(1)-Zn1-O(4)V 81.64(7)

O(6)-Zn1-O(4)V 146.08(7)

O(3)V-Zn1-O(4)V 50.07(7)

O(8)-Zn2-O(7)IV 98.31(9)

O(8)-Zn2-O(2)IV 113.17(8)

O(7)IV-Zn2-O(2)IV 96.59(8)

O(8)-Zn2-O(1W) 106.58(10)

O(7)IV-Zn2-O(1W) 85.97(9)

O(2)IV-Zn2-O(1W) 139.26(9)

O(8)-Zn2-O(4)VI 95.45(9)

O(7)IV-Zn2-O(4)VI 162.55(9)

O(2)IV-Zn2-O(4)VI 87.76(8)

O(1W)-Zn2-O(4)VI 79.84(8)

O(8)-Zn2-O(9)VII 170.77(7)

O(7)IV-Zn2-O(9)VII 90.53(8)

O(2)IV-Zn2-O(9)VII 68.12(7)

O(1W)-Zn2-O(9)VII 71.21(8)

O(4)VI-Zn2-O(9)VII 75.38(7)

Symmetry transformations used to generate equivalent atoms:

**I:** y, -x+y+1, -z **II:** x-y+2/3, x+1/3, -z+1/3 **III:** -y+1, x-y+1, z

**IV:** x-y+1, x, -z **V:** y-1/3, -x+y+1/3, -z+1/3 **VI:** -x+y, -x+1, z

**VII:** -x+y+2/3, -x+4/3, z+1/3

**Table S2.** Hydrogen bonds for Zn2(BzOip)2(H2O)·0.22MeOH·0.23H2O [Å and °].

D-H···A d(D-H) d(H···A) d(D···A) <(DHA)

O(1W)-H(2W)···O1SdVIII  0.896(10) 1.91(3) 2.649(6) 139(4)

O(1W)-H(1W)···O5IX 0.900(10) 1.93(2) 2.753(3) 152(4)

Symmetry transformations used to generate equivalent atoms:

**I:** y, -x+y+1, -z **II:** x-y+2/3, x+1/3, -z+1/3 **III:** -y+1, x-y+1, z

**IV:** x-y+1, x, -z **V:** y-1/3, -x+y+1/3, -z+1/3 **VI:** -x+y, -x+1, z

**VII:** -x+y+2/3, -x+4/3, z+1/3 **VIII:** -x+4/3, -y+5/3, -z-1/3

**IX:** -y+5/3, x-y+4/3, z+1/3

**Table S3.** Bond lengths [Å] and angles [°] for Zn2(BzOip)2(H2O) from EtOH.

O(1)-Zn(1) 1.948(2)

O(2)-Zn(2) 1.988(2)

O(1W)-Zn(2) 2.050(2)

O(3)-Zn(2)I 1.995(2)

O(4)-Zn(1)I 1.962(2)

O(6)-Zn(1) 1.959(2)

O(7)-Zn(2)II 2.022(2)

O(7)-Zn(1) 2.884(2)

O(8)-Zn(1)III 1.974(2)

O(9)-Zn(2)III 2.040(2)

Zn(1)-O(8)V 1.973(2)

Zn(2)-O(7)VI 2.023(2)

Zn(2)-O(1)VI 3.315(2)

Zn(2)II-O(7)-Zn(1) 104.64(9)

O(1)-Zn(1)-O(6) 108.35(9)

O(1)-Zn(1)-O(4)IV 108.01(10)

O(6)-Zn(1)-O(4)IV 97.04(9)

O(1)-Zn(1)-O(8)V 115.16(9)

O(6)-Zn(1)-O(8)V 108.79(9)

O(4)IV-Zn(1)-O(8)V 117.69(9)

O(1)-Zn(1)-O(7) 85.45(8)

O(6)-Zn(1)-O(7) 50.20(7)

O(4)IV-Zn(1)-O(7) 147.23(8)

O(8)V-Zn(1)-O(7) 80.02(7)

O(2)-Zn(2)-O(3)IV 98.21(9)

O(2)-Zn(2)-O(7)VI 98.90(9)

O(3)IV-Zn(2)-O(7)VI 160.03(9)

O(2)-Zn(2)-O(9)V 111.78(9)

O(3)IV-Zn(2)-O(9)V 95.10(9)

O(7)VI-Zn(2)-O(9)V 88.05(8)

O(2)-Zn(2)-O(1W) 105.93(11)

O(3)IV-Zn(2)-O(1W) 85.96(10)

O(7)VI-Zn(2)-O(1W) 79.50(9)

O(9)V-Zn(2)-O(1W) 141.67(10)

O(2)-Zn(2)-O(1)VI 172.15(7)

O(3)IV-Zn(2)-O(1)VI 89.61(8)

O(7)VI-Zn(2)-O(1)VI 73.27(7)

O(9)V-Zn(2)-O(1)VI 68.02(7)

O(1W)-Zn(2)-O(1)VI 73.68(9)

Symmetry transformations used to generate equivalent atoms:

**I:** y, -x+y, -z+1 **II:** -y+2/3, x-y+1/3, z+1/3 **III:** y-1/3, -x+y+1/3, -z+4/3

**IV:** x-y, x, -z+1 **V:** x-y+2/3, x+1/3, -z+4/3 **VI:** -x+y+1/3, -x+2/3, z-1/3

**Table S4.** Hydrogen bonds for Zn2(BzOip)2(H2O) from EtOH [Å and °].

D-H···A d(D-H) d(H···A) d(D···A) <(DHA)

O(1W)-H(2W)···O(10)VII 0.893(10) 1.916(17) 2.761(3) 157(3)

O(1W)-H(1W)···O(8)I 0.893(10) 2.050(15) 2.911(3) 162(3)

Symmetry transformations used to generate equivalent atoms:

**I:** y, -x+y, -z+1 **II:** -y+2/3, x-y+1/3, z+1/3 **III:** y-1/3, -x+y+1/3, -z+4/3

**IV:** x-y, x, -z+1 **V:** x-y+2/3, x+1/3, -z+4/3 **VI:** -x+y+1/3, -x+2/3, z-1/3

**VII:** -y+2/3, x-y+1/3, z-2/3

**Table S5.** Bond lengths [Å] and angles [°] for Zn2(BzOip)2(H2O) from *i*PrOH.

O(1)-Zn(2) 1.9926(18)

O(2)-Zn(1) 1.9518(17)

O(1W)-Zn(2) 2.0434(19)

O(3)-Zn(1) 1.9454(18)

O(4)-Zn(2) 1.9760(17)

O(6)-Zn(1) 1.9704(17)

O(7)-Zn(2) 2.0401(17)

O(7)-Zn(1) 3.0273(18)

O(8)-Zn(2)V 2.0147(17)

O(9)-Zn(1) 1.9475(17)

Zn(2)-O(8)VI 2.0146(17)

Zn(2)-O(3)VI 3.2932(19)

Zn(2)-O(7)-Zn(1) 82.38(5)

C(20)-O(8)-Zn(2)V 139.05(16)

O(3)-Zn(1)-O(9) 108.54(7)

O(3)-Zn(1)-O(2) 108.10(8)

O(9)-Zn(1)-O(2) 96.69(7)

O(3)-Zn(1)-O(6) 115.17(8)

O(9)-Zn(1)-O(6) 108.70(7)

O(2)-Zn(1)-O(6) 117.80(7)

O(3)-Zn(1)-O(7) 109.85(6)

O(9)-Zn(1)-O(7) 141.01(6)

O(2)-Zn(1)-O(7) 77.71(6)

O(6)-Zn(1)-O(7) 47.13(6)

O(4)-Zn(2)-O(1) 98.16(8)

O(4)-Zn(2)-O(8)VI 99.01(7)

O(1)-Zn(2)-O(8)VI 159.87(8)

O(4)-Zn(2)-O(7) 112.04(7)

O(1)-Zn(2)-O(7) 95.07(7)

O(8)VI-Zn(2)-O(7) 88.16(7)

O(4)-Zn(2)-O(1W) 105.70(9)

O(1)-Zn(2)-O(1W) 85.89(8)

O(8)VI-Zn(2)-O(1W) 79.42(7)

O(7)-Zn(2)-O(1W) 141.67(8)

O(4)-Zn(2)-O(3)VI 172.24(6)

O(1)-Zn(2)-O(3)VI 89.55(7)

O(8)VI-Zn(2)-O(3)VI 73.26(6)

O(7)-Zn(2)-O(3)VI 67.77(6)

O(1W)-Zn(2)-O(3)VI 73.93(7)

Symmetry transformations used to generate equivalent atoms:

**I:** x-y+2/3, x+1/3, -z+4/3 **II:** y-1/3, -x+y+1/3, -z+4/3

**III:** x-y+1/3, x-1/3, -z+5/3 **IV:** y+1/3, -x+y+2/3, -z+5/3

**V:** -y+2/3, x-y+1/3, z+1/3 **VI:** -x+y+1/3, -x+2/3, z-1/3

**Table S6.** Hydrogen bonds for Zn2(BzOip)2(H2O) from *i*PrOH [Å and °].

D-H···A d(D-H) d(H···A) d(D···A) <(DHA)

O(1W)-H(1W)···O(6)VI 0.893(9) 2.028(13) 2.892(3) 162(2)

O(1W)-H(2W)···O(10)VII 0.890(9) 1.909(14) 2.757(3) 159(2)

Symmetry transformations used to generate equivalent atoms:

**I:** x-y+2/3, x+1/3, -z+4/3 **II:** y-1/3, -x+y+1/3, -z+4/3

**III:** x-y+1/3, x-1/3, -z+5/3 **IV:** y+1/3, -x+y+2/3, -z+5/3

**V:** -y+2/3, x-y+1/3, z+1/3 **VI:** -x+y+1/3, -x+2/3,z -1/3

**VII:** x-y, x, -z+1

### Co2(BzOip)2(H2O) from MeOH

**Table S7.** Bond lengths [Å] and angles [°] for Co2(BzOip)2(H2O)·0.29MeOH·0.29H2O from MeOH Batch 1 Run 1.

O(1)-Co1 1.9618(13)

O(2)-Co2 2.0093(14)

O(1W)-Co2 2.0147(14)

O(3)-Co1 1.9763(13)

O(4)-Co2V 2.0570(14)

O(4)-Co1 2.8598(16)

O(6)-Co2 2.0126(14)

O(7)-Co1 1.9715(14)

O(8)-Co2 2.0246(15)

O(9)-Co1 1.9563(16)

Co2-O(4)VI 2.0570(14)

Co2-O(9)VI 2.937(2)

O(9)-Co1-O(1) 116.13(7)

O(9)-Co1-O(7) 109.87(7)

O(1)-Co1-O(7) 117.49(6)

O(9)-Co1-O(3) 107.73(6)

O(1)-Co1-O(3) 109.31(6)

O(7)-Co1-O(3) 93.60(6)

O(9)-Co1-O(4) 83.55(6)

O(1)-Co1-O(4) 82.07(5)

O(7)-Co1-O(4) 144.16(5)

O(3)-Co1-O(4) 50.62(5)

O(2)-Co2-O(6) 96.63(6)

O(2)-Co2-O(1W) 149.27(6)

O(6)-Co2-O(1W) 88.50(6)

O(2)-Co2-O(8) 109.40(6)

O(6)-Co2-O(8) 95.48(7)

O(1W)-Co2-O(8) 100.17(6)

O(2)-Co2-O(4)VI 88.62(6)

O(6)-Co2-O(4)VI 167.95(6)

O(1W)-Co2-O(4)VI 81.56(6)

O(8)-Co2-O(4)VI 92.97(6)

O(2)-Co2-O(9)VI 73.79(5)

O(6)-Co2-O(9)VI 91.08(6)

O(1W)-Co2-O(9)VI 75.84(6)

O(8)-Co2-O(9)VI 172.26(5)

O(4)VI-Co2-O(9)VI 79.95(5)

Symmetry transformations used to generate equivalent atoms:

**I:** x-y+2/3, x+1/3, -z+1/3 **II:** y-1/3, -x+y+1/3, -z+1/3

**III:** x-y+1, x, -z **IV:** y, -x+y+1, -z **V:** -y+5/3, x-y+4/3, z+1/3

**VI:** -x+y+1/3, -x+5/3, z-1/3

**Table S8.** Hydrogen bonds for Co2(BzOip)2(H2O)·0.29MeOH·0.29H2O [Å and °] from MeOH Batch 1 Run 1.

D-H···A d(D-H) d(H···A) d(D···A) <(DHA)

O(1W)-H(2W)···O1SVII 0.898(10) 1.839(16) 2.678(3) 154(3)

O(1W)-H(1W)···O5VIII 0.891(10) 1.900(15) 2.740(2) 157(2)

O(1Sb)-H(1Sb)···O3V 0.903(10) 1.999(12) 2.900(3) 175(5)

Symmetry transformations used to generate equivalent atoms:

**I:** x-y+2/3, x+1/3, -z+1/3 **II:** y-1/3, -x+y+1/3, -z+1/3

**III:** x-y+1, x, -z **IV:** y, -x+y+1, -z **V:** -y+5/3, x-y+4/3, z+1/3

**VI:** -x+y+1/3, -x+5/3, z-1/3 **VII:** -x+5/3, -y+7/3, -z+1/3

**VIII:** x-y+4/3, x+2/3, -z-1/3

**Table S9.** Bond lengths [Å] and angles [°] for Co2(BzOip)2(H2O)·0.3MeOH·0.3H2O from MeOH Batch 1 Run 2.

CO1-O(7) 1.9561(18)

CO1-O(2) 1.9590(15)

CO1-O(9) 1.9729(16)

CO1-O(4) 1.9739(15)

CO1-O(1) 3.0656(17)

CO2-O(8) 2.0076(16)

CO2-O(1) 2.0082(16)

CO2-O(1W) 2.0126(17)

CO2-O(6) 2.0309(17)

CO2-O(3)V 2.0529(16)

O(3)-CO2VI 2.0530(16)

O(7)-CO1-O(2) 116.33(7)

O(7)-CO1-O(9) 109.65(8)

O(2)-CO1-O(9) 117.29(7)

O(7)-CO1-O(4) 107.74(7)

O(2)-CO1-O(4) 109.31(7)

O(9)-CO1-O(4) 93.85(7)

O(7)-CO1-O(1) 108.64(6)

O(2)-CO1-O(1) 46.33(5)

O(9)-CO1-O(1) 80.50(6)

O(4)-CO1-O(1) 142.94(6)

O(8)-CO2-O(1) 96.48(7)

O(8)-CO2-O(1W) 88.69(7)

O(1)-CO2-O(1W) 149.77(7)

O(8)-CO2-O(6) 95.70(7)

O(1)-CO2-O(6) 109.20(7)

O(1W)-CO2-O(6) 99.83(8)

O(8)-CO2-O(3)V 167.93(7)

O(1)-CO2-O(3)V 88.44(7)

O(1W)-CO2-O(3)V 81.63(7)

O(6)-CO2-O(3)V 93.06(7)

Symmetry transformations used to generate equivalent atoms:

**I:** y+1/3, -x+y+2/3, -z+2/3 **II:** x-y+1/3, x-1/3, -z+2/3

**III:** x-y-1/3, x-2/3, -z+1/3 **IV:** y+2/3, -x+y+1/3, -z+1/3

**V:** -y+1/3, x-y-1/3, z-1/3 **VI:** -x+y+2/3, -x+1/3, z+1/3

**Table S10.** Hydrogen bonds for Co2(BzOip)2(H2O)·0.3MeOH·0.3H2O [Å and °] from MeOH Batch 1 Run 2.

D-H···A d(D-H) d(H···A) d(D···A) <(DHA)

O(1W)-H(2W)...O1SVI 0.891(10) 1.815(14) 2.671(4) 160(3)

O(1W)-H(1W)...O5VIII 0.899(10) 1.909(16) 2.744(2) 154(2)

O(1Sb)-H(1Sb)...O4VI 0.901(10) 2.05(2) 2.916(4) 162(5)

Symmetry transformations used to generate equivalent atoms:

**I:** y+1/3, -x+y+2/3, -z+2/3 **II:** x-y+1/3, x-1/3, -z+2/3

**III:** x-y-1/3, x-2/3, -z+1/3 **IV:** y+2/3, -x+y+1/3, -z+1/3

**V:** -y+1/3, x-y-1/3, z-1/3 **VI:** -x+y+2/3, -x+1/3, z+1/3

**VII:** -x+1/3, -y-1/3, -z+2/3 **VIII:** y, -x+y, -z

**Table S11.** Bond lengths [Å] and angles [°] for Co2(BzOip)2(H2O)·0.3MeOH·0.3H2O from MeOH Batch 1 Run 3.

Co1-O(6) 1.960(2)

Co1-O(2) 1.9607(17)

Co1-O(8) 1.9759(18)

Co1-O(3) 1.9804(17)

Co1-O(1) 3.0735(18)

Co2-O(9) 2.0099(18)

Co2-O(1) 2.0141(18)

Co2-O(1W) 2.0174(19)

Co2-O(7) 2.0354(19)

Co2-O(4) 2.0546(18)

Co2-O(6)#6 2.954(2)

O(6)-Co1-O(2) 116.35(8)

O(6)-Co1-O(8) 109.72(9)

O(2)-Co1-O(8) 117.33(8)

O(6)-Co1-O(3) 107.78(8)

O(2)-Co1-O(3) 109.17(7)

O(8)-Co1-O(3) 93.78(7)

O(6)-Co1-O(1) 108.69(6)

O(2)-Co1-O(1) 46.37(6)

O(8)-Co1-O(1) 80.54(6)

O(3)-Co1-O(1) 142.84(6)

O(9)-Co2-O(1) 96.56(8)

O(9)-Co2-O(1W) 88.79(8)

O(1)-Co2-O(1W) 149.61(8)

O(9)-Co2-O(7) 95.43(8)

O(1)-Co2-O(7) 109.23(7)

O(1W)-Co2-O(7) 99.95(8)

O(9)-Co2-O(4) 168.08(8)

O(1)-Co2-O(4) 88.39(7)

O(1W)-Co2-O(4) 81.57(7)

O(7)-Co2-O(4) 93.14(8)

O(9)-Co2-O(6)VI 91.04(7)

O(1)-Co2-O(6)VI 74.40(6)

O(1W)-Co2-O(6)VI 75.61(7)

O(7)-Co2-O(6)VI 172.09(6)

O(4)-Co2-O(6)VI 79.82(7)

Symmetry transformations used to generate equivalent atoms:

**I:** y-1/3, -x+y+1/3, -z+4/3 **II:** -x+y-1/3, -x+1/3, z+1/3

**III:** x-y+2/3, x+1/3, -z+4/3 **IV:** x-y, x, -z+1 **V:** y, -x+y, -z+1

**VI:** -y+1/3, x-y+2/3, z-1/3

**Table S12.** Hydrogen bonds for Co2(BzOip)2(H2O)·0.3MeOH·0.3H2O [Å and °] from MeOH Batch 1 Run 3.

D-H···A d(D-H) d(H···A) d(D···A) <(DHA)

O(1W)-H(1W)···O5VII 0.899(10) 1.920(16) 2.750(3) 153(2)

O(1W)-H(2W)···O1SVIII 0.886(10) 1.820(14) 2.677(4) 162(3)

O(1S)-H(1S)···O3II 0.902(10) 2.09(3) 2.924(4) 154(5)

Symmetry transformations used to generate equivalent atoms:

**I:** y-1/3, -x+y+1/3, -z+4/3 **II:** -x+y-1/3, -x+1/3, z+1/3

**III:** x-y+2/3, x+1/3, -z+4/3 **IV:** x-y, x, -z+1 **V:** y, -x+y, -z+1

**VI:** -y+1/3, x-y+2/3, z-1/3 **VII:** y-2/3, -x+y-1/3, -z+2/3

**VIII:** -x-1/3, -y+1/3, -z+4/3

**Table S13.** Bond lengths [Å] and angles [°] for Co2(BzOip)2(H2O)·0.28MeOH·0.28H2O from MeOH Batch 2 Run 1.

Co1-O(6) 1.958(2)

Co1-O(2) 1.9584(19)

Co1-O(9) 1.965(2)

Co1-O(3) 1.9720(19)

Co2-O(8)V 2.007(2)

Co2-O(1)V 2.011(2)

Co2-O(1W) 2.012(2)

Co2-O(7)V 2.025(2)

Co2-O(4) 2.051(2)

Co2-O(6) 2.950(3)

O(1)-Co2VI 2.012(2)

O(7)-Co2VI 2.025(2)

O(6)-Co1-O(2) 116.00(9)

O(6)-Co1-O(9) 109.77(10)

O(2)-Co1-O(9) 117.46(9)

O(6)-Co1-O(3) 108.03(9)

O(2)-Co1-O(3) 109.20(9)

O(9)-Co1-O(3) 93.77(9)

O(8)V-Co2-O(1)V 96.49(9)

O(8)V-Co2-O(1W) 88.54(9)

O(1)V-Co2-O(1W) 149.68(9)

O(8)V-Co2-O(7)V 95.57(9)

O(1)V-Co2-O(7)V 109.29(8)

O(1W)-Co2-O(7)V 99.88(10)

O(8)V-Co2-O(4) 167.81(9)

O(1)V-Co2-O(4) 88.40(8)

O(1W)-Co2-O(4) 81.71(9)

O(7)V-Co2-O(4) 93.32(9)

O(8)V-Co2-O(6) 90.89(8)

O(1)V-Co2-O(6) 74.29(7)

O(1W)-Co2-O(6) 75.76(8)

O(7)V-Co2-O(6) 172.14(8)

O(4)-Co2-O(6) 79.65(7)

Symmetry transformations used to generate equivalent atoms:

**I:** x-y+1/3,x-1/3,-z+2/3 **II:** y+1/3,-x+y+2/3,-z+2/3

**III:** y,-x+y,-z+1 **IV:** x-y,x,-z+1 **V:** -y+1/3,x-y-1/3,z-1/3

**VI:** -x+y+2/3,-x+1/3,z+1/3

**Table S14.** Hydrogen bonds for Co2(BzOip)2(H2O)·0.28MeOH·0.28H2O [Å and °] from MeOH Batch 2 Run 1.

D-H···A d(D-H) d(H···A) d(D···A) <(DHA)

O(1W)-H(2W)···O5VII 0.900(10) 1.916(18) 2.746(3) 153(3)

O(1W)-H(1W)···O1SVIII 0.890(10) 1.800(13) 2.675(5) 167(4)

O(1Sb)-H(1Sb)···O3V 0.899(10) 2.07(3) 2.912(5) 156(6)

Symmetry transformations used to generate equivalent atoms:

**I:** x-y+1/3, x-1/3, -z+2/3 **II:** y+1/3, -x+y+2/3, -z+2/3

**III:** y, -x+y, -z+1 **IV:** x-y, x, -z+1 **V:** -y+1/3, x-y-1/3, z-1/3

**VI:** -x+y+2/3, -x+1/3, z+1/3 **VII:** -x+1, -y, -z+1 **VIII:** y+2/3, -x+y+1/3, -z+1/3

**Table S15.** Bond lengths [Å] and angles [°] for Co2(BzOip)2(H2O)·0.29MeOH·0.29H2O from MeOH Batch 2 Run 2.

Co1-O(6) 1.961(3)

Co1-O(8) 1.978(2)

Co1-O(1) 1.980(2)

Co1-O(2) 2.880(3)

Co2-O(9) 2.014(2)

Co2-O(4)V 2.014(2)

Co2-O(1W) 2.018(2)

Co2-O(7) 2.040(2)

Co2-O(2) 2.054(2)

Co2-O(6) 2.954(3)

O(3)-Co1VI 1.961(2)

O(4)-Co2V 2.014(2)

O(3)IV-Co1-O(6) 116.31(11)

O(3)IV-Co1-O(8) 117.16(10)

O(6)-Co1-O(8) 109.86(11)

O(3)IV-Co1-O(1) 109.25(10)

O(6)-Co1-O(1) 107.63(10)

O(8)-Co1-O(1) 93.95(10)

O(3)IV-Co1-O(2) 82.66(8)

O(6)-Co1-O(2) 83.24(10)

O(8)-Co1-O(2) 144.17(9)

O(1)-Co1-O(2) 50.31(8)

O(9)-Co2-O(4)V 96.43(10)

O(9)-Co2-O(1W) 88.68(10)

O(4)V-Co2-O(1W) 149.85(11)

O(9)-Co2-O(7) 95.40(10)

O(4)V-Co2-O(7) 109.18(10)

O(1W)-Co2-O(7) 99.82(11)

O(9)-Co2-O(2) 168.08(11)

O(4)V-Co2-O(2) 88.48(10)

O(1W)-Co2-O(2) 81.73(10)

O(7)-Co2-O(2) 93.22(10)

O(9)-Co2-O(6) 90.96(9)

O(4)V-Co2-O(6) 74.48(8)

O(1W)-Co2-O(6) 75.75(10)

O(7)-Co2-O(6) 172.19(9)

O(2)-Co2-O(6) 79.85(9)

Symmetry transformations used to generate equivalent atoms:

**I:** -x+y-1/3, -x+4/3, z+1/3 **II:** y-1/3, -x+y+1/3, -z+7/3

**III:** x-y+2/3, x+1/3, -z+7/3 **IV:** x-y+1, x+1, -z+2 **V:** -x+1/3, -y+5/3, -z+5/3

**VI:** y-1, -x+y, -z+2 **VII:**-y+4/3, x-y+5/3, z-1/3

**Table S16.** Hydrogen bonds for Co2(BzOip)2(H2O)·0.28MeOH·0.28H2O [Å and °] from MeOH Batch 2 Run 2.

D-H···A d(D-H) d(H···A) d(D···A) <(DHA)

O(1W)-H(1W)···O5I 0.898(10) 1.92(2) 2.750(3) 154(3)

O(1W)-H(2W)···O1SbVIII 0.894(10) 1.83(2) 2.674(6) 157(4)

O(1Sb)-H(1Sb)···O1VII 0.901(10) 2.07(3) 2.922(5) 156(7)

Symmetry transformations used to generate equivalent atoms:

**I:** -x+y-1/3, -x+4/3, z+1/3 **II:** y-1/3, -x+y+1/3, -z+7/3

**III:** x-y+2/3, x+1/3, -z+7/3 **IV:** x-y+1, x+1, -z+2 **V:** -x+1/3, -y+5/3, -z+5/3

**VI:** y-1, -x+y, -z+2 **VII:** -y+4/3, x-y+5/3, z-1/3 **VIII:** y-2/3, -x+y+2/3, -z+5/3

### Co2(BzOip)2(H2O) from EtOH

**Table S17.** Bond lengths [Å] and angles [°] for Co2(BzOip)2(H2O)·0.19H2O from EtOH Batch 1 Run 1.

O(1)-Co1 1.9661(13)

O(2)-Co2I 2.0318(14)

O(2)-Co1 2.8279(15)

O(1W)-Co2 2.0320(14)

O(3)-Co1II 1.9727(13)

O(4)-Co2III 2.0262(13)

O(6)-Co2IV 2.0125(14)

O(7)-Co1 1.9536(15)

O(8)-Co1V 1.9646(13)

O(9)-Co2 2.0126(14)

Co1-O(8)IV 1.9645(13)

Co1-O(3)VI 1.9725(13)

Co2-O(4)VII 2.0261(13)

Co2-O(2)I 2.0316(14)

Co2-O(7)I 3.0531(18)

Co2I-O(2)-Co1 100.57(5)

O(7)-Co1-O(8)IV 109.89(7)

O(7)-Co1-O(1) 108.40(6)

O(8)IV-Co1-O(1) 94.26(6)

O(7)-Co1-O(3)VI 114.08(6)

O(8)IV-Co1-O(3)VI 118.70(6)

O(1)-Co1-O(3)VI 109.37(6)

O(7)-Co1-O(2) 83.71(6)

O(8)IV-Co1-O(2) 145.49(5)

O(1)-Co1-O(2) 51.27(5)

O(3)VI-Co1-O(2) 80.41(5)

O(6)V-Co2-O(9) 95.00(6)

O(6)V-Co2-O(4)VII 109.66(6)

O(9)-Co2-O(4)VII 95.43(6)

O(6)V-Co2-O(2)I 96.59(6)

O(9)-Co2-O(2)I 165.26(6)

O(4)VII-Co2-O(2)I 89.21(6)

O(6)V-Co2-O(1W) 102.10(7)

O(9)-Co2-O(1W) 87.72(6)

O(4)VII-Co2-O(1W) 147.64(6)

O(2)I-Co2-O(1W) 80.99(6)

O(6)V-Co2-O(7)I 173.27(5)

O(9)-Co2-O(7)I 91.44(5)

O(4)VII-Co2-O(7)I 71.57(5)

O(2)I-Co2-O(7)I 76.74(5)

O(1W)-Co2-O(7)I 76.16(6)

Symmetry transformations used to generate equivalent atoms:

**I:** -x+5/3, -y+4/3, -z+1/3 **II:** x-y+2/3, x+1/3, -z+1/3

**III:** x-1/3, y+1/3, z+1/3 **IV:** y, -x+y+1, -z **V:** x-y+1, x, -z

**VI:** y-1/3, -x+y+1/3, -z+1/3 **VII:** x+1/3, y-1/3, z-1/3

**Table S18.** Hydrogen bonds for Co2(BzOip)2(H2O)·0.19H2O [Å and °] from EtOH Batch 1 Run 1.

D-H···A d(D-H) d(H···A) d(D···A) <(DHA)

O(1W)-H(1W)···O3VIII 0.896(10) 2.046(15) 2.895(2) 157(3)

O(1W)-H(2W)···O5IX 0.892(10) 1.883(14) 2.734(2) 159(3)

Symmetry transformations used to generate equivalent atoms:

**I:** -x+5/3,-y+4/3,-z+1/3 **II:** x-y+2/3,x+1/3,-z+1/3

**III:** x-1/3,y+1/3,z+1/3 **IV:** y,-x+y+1,-z **V:** x-y+1,x,-z

**VI:** y-1/3,-x+y+1/3,-z+1/3 **VII:** x+1/3,y-1/3,z-1/3

**VIII:** -y+2,x-y+1,z **IX:** y+1/3,-x+y+2/3,-z+2/3

**Table S19.** Bond lengths [Å] and angles [°] for Co2(BzOip)2(H2O)·0.22H2O from EtOH Batch 1 Run 2.

Co2-O(8)III 2.006(3)

Co2-O(7)I 2.018(3)

Co2-O(1) 2.028(2)

Co2-O(3) 2.029(3)

Co2-O(1W) 2.032(3)

Co2-O(6) 3.036(3)

Co1-O(6) 1.956(3)

Co1-O(9)IV 1.964(3)

Co1-O(4) 1.967(2)

Co1-O(2) 1.976(2)

Co1-O(1)V 3.036(3)

O(8)III-Co2-O(7)I 94.88(11)

O(8)III-Co2-O(1) 95.48(11)

O(7)I-Co2-O(1) 109.68(10)

O(8)III-Co2-O(3) 165.28(11)

O(7)I-Co2-O(3) 96.82(11)

O(1)-Co2-O(3) 88.96(10)

O(8)III-Co2-O(1W) 87.80(11)

O(7)I-Co2-O(1W) 100.85(12)

O(1)-Co2-O(1W) 148.85(12)

O(3)-Co2-O(1W) 81.26(11)

O(8)III-Co2-O(6) 90.93(10)

O(7)I-Co2-O(6) 173.53(9)

O(1)-Co2-O(6) 72.49(9)

O(3)-Co2-O(6) 77.00(9)

O(1W)-Co2-O(6) 76.50(11)

O(6)-Co1-O(9)IV 109.84(12)

O(6)-Co1-O(4) 108.38(11)

O(9)IV-Co1-O(4) 94.30(11)

O(6)-Co1-O(2) 114.19(12)

O(9)IV-Co1-O(2) 118.84(11)

O(4)-Co1-O(2) 109.11(11)

O(6)-Co1-O(1)V 109.67(9)

O(9)IV-Co1-O(1)V 79.56(9)

O(4)-Co1-O(1)V 141.26(9)

O(2)-Co1-O(1)V 47.04(8)

Symmetry transformations used to generate equivalent atoms:

**I:** -y+1/3, x-y-1/3, z-1/3 **II:** -x+2/3, -y+1/3, -z+1/3

**III:** -x+1/3, -y-1/3, -z+2/3 **IV:** x-y, x, -z+1 **V:** -x+y+2/3, -x+1/3, z+1/3

**VI:** y, -x+y, -z+1

**Table S20.** Hydrogen bonds for Co2(BzOip)2(H2O)·0.22H2O [Å and °] from EtOH Batch 1 Run 2.

D-H···A d(D-H) d(H···A) d(D···A) <(DHA)

O(1W)-H(1W)···O5VII 0.895(10) 1.90(2) 2.743(4) 157(4)

O(1W)-H(2W)···O(2) 0.891(10) 2.06(2) 2.915(4) 160(4)

Symmetry transformations used to generate equivalent atoms:

**I:** -y+1/3,x-y-1/3,z-1/3 **II:** -x+2/3,-y+1/3,-z+1/3

**III:** -x+1/3,-y-1/3,-z+2/3 **IV:** x-y,x,-z+1 **V:** -x+y+2/3,-x+1/3,z+1/3

**VI:** y, -x+y, -z+1 **VII:** x-y+1/3, x-1/3, -z+2/3

**Table S21.** Bond lengths [Å] and angles [°] for Co2(BzOip)2(H2O)·0.19H2O from EtOH Batch 1 Run 3.

Co1-O(6) 1.956(2)

Co1-O(9) 1.970(2)

Co1-O(4)IV 1.974(2)

Co1-O(1) 1.976(2)

Co1-O(2) 3.048(2)

Co2-O(8) 2.010(2)

Co2-O(7) 2.028(2)

Co2-O(3) 2.029(2)

Co2-O(2) 2.032(2)

Co2-O(1W) 2.039(2)

Co2-O(6)V 3.056(3)

O(6)-Co1-O(9) 109.90(11)

O(6)-Co1-O(4)IV 108.35(10)

O(9)-Co1-O(4)IV 94.60(9)

O(6)-Co1-O(1) 114.04(10)

O(9)-Co1-O(1) 118.74(10)

O(4)IV-Co1-O(1) 109.10(9)

O(6)-Co1-O(2) 109.67(8)

O(9)-Co1-O(2) 79.21(8)

O(4)IV-Co1-O(2) 141.29(8)

O(1)-Co1-O(2) 47.18(7)

O(8)-Co2-O(7) 94.94(10)

O(8)-Co2-O(3) 165.26(10)

O(7)-Co2-O(3) 96.82(10)

O(8)-Co2-O(2) 95.36(9)

O(7)-Co2-O(2) 109.51(9)

O(3)-Co2-O(2) 89.06(9)

O(8)-Co2-O(1W) 87.89(10)

O(7)-Co2-O(1W) 101.01(11)

O(3)-Co2-O(1W) 81.17(9)

O(2)-Co2-O(1W) 148.85(10)

O(8)-Co2-O(6)V 90.93(9)

O(7)-Co2-O(6)V 173.50(8)

O(3)-Co2-O(6)V 76.96(8)

O(2)-Co2-O(6)V 72.62(8)

O(1W)-Co2-O(6)V 76.37(9)

Symmetry transformations used to generate equivalent atoms:

**I:** -x+2/3, -y+7/3, -z+1/3 **II:** y-1/3, -x+y+1/3, -z+1/3

**III:** x-y+2/3, x+1/3, -z+1/3 **IV:** -y+4/3, x-y+5/3, z-1/3

**V:** -x+y-1/3, -x+4/3, z+1/3

**Table S22.** Hydrogen bonds for Co2(BzOip)2(H2O)·0.19H2O [Å and °] from EtOH Batch 1 Run 3.

D-H···A d(D-H) d(H···A) d(D···A) <(DHA)

O(1W)-H(1W)···O5V 0.892(10) 1.896(19) 2.745(3) 158(4)

O(1W)-H(2W)···O1V 0.893(10) 2.046(14) 2.923(3) 167(4)

Symmetry transformations used to generate equivalent atoms:

**I:** -x+2/3, -y+7/3, -z+1/3 **II:** y-1/3, -x+y+1/3, -z+1/3

**III:** x-y+2/3, x+1/3, -z+1/3 **IV:** -y+4/3, x-y+5/3, z-1/3

**V:** -x+y-1/3, -x+4/3, z+1/3

**Table S23.** Bond lengths [Å] and angles [°] for Co2(BzOip)2(H2O)·0.22H2O from EtOH Batch 2 Run 1.

Co1-O(7) 1.949(3)

Co1-O(2) 1.958(3)

Co1-O(8) 1.959(3)

Co1-O(3) 1.963(3)

Co2-O(9) 2.001(3)

Co2-O(1) 2.016(3)

Co2-O(6) 2.017(3)

Co2-O(4) 2.019(3)

Co2-O(1W) 2.025(3)

O(7)-Co1-O(2) 108.16(13)

O(7)-Co1-O(8) 109.86(15)

O(2)-Co1-O(8) 94.49(13)

O(7)-Co1-O(3) 114.28(14)

O(2)-Co1-O(3) 109.08(13)

O(8)-Co1-O(3) 118.76(13)

O(9)-Co2-O(1) 165.79(14)

O(9)-Co2-O(6) 94.64(14)

O(1)-Co2-O(6) 96.48(13)

O(9)-Co2-O(4) 95.65(13)

O(1)-Co2-O(4) 89.00(12)

O(6)-Co2-O(4) 109.32(13)

O(9)-Co2-O(1W) 88.05(14)

O(1)-Co2-O(1W) 81.30(13)

O(6)-Co2-O(1W) 100.21(15)

O(4)-Co2-O(1W) 149.79(14)

Symmetry transformations used to generate equivalent atoms:

**I:** -y+4/3,x-y+2/3,z-1/3 **II:** -x+4/3,-y+5/3,-z+2/3

**III:** x-y+1/3,x-1/3,-z+2/3 **IV:** y+1/3,-x+y+2/3,-z+2/3

**V:** -x+y+2/3,-x+4/3,z+1/3

**Table S24.** Hydrogen bonds for Co2(BzOip)2(H2O)·0.22H2O [Å and °] from EtOH Batch 2 Run 1.

D-H···A d(D-H) d(H···A) d(D···A) <(DHA)

O(1W)-H(2W)···O5I 0.900(5) 1.86(2) 2.725(4) 160(5)

O(1W)-H(1W)···O3I 0.899(5) 2.031(14) 2.912(4) 166(5)

Symmetry transformations used to generate equivalent atoms:

**I:** -y+4/3, x-y+2/3, z-1/3 **II:** -x+4/3, -y+5/3, -z+2/3

**III:** x-y+1/3, x-1/3, -z+2/3 **IV:** y+1/3, -x+y+2/3, -z+2/3

**V:** -x+y+2/3, -x+4/3, z+1/3

**Table S25.** Bond lengths [Å] and angles [°] for Co2(BzOip)2(H2O)·0.19H2O from EtOH Batch 2 Run 2.

Co1-O(6) 1.954(3)

Co1-O(8) 1.962(2)

Co1-O(4) 1.966(2)

Co1-O(1) 1.968(2)

Co2-O(9) 2.006(2)

Co2-O(3) 2.023(2)

Co2-O(7) 2.025(2)

Co2-O(2) 2.028(2)

Co2-O(1W) 2.034(3)

O(6)-Co1-O(8) 109.97(12)

O(6)-Co1-O(4) 108.30(11)

O(8)-Co1-O(4) 94.32(10)

O(6)-Co1-O(1) 114.09(11)

O(8)-Co1-O(1) 119.03(10)

O(4)-Co1-O(1) 108.92(10)

O(9)-Co2-O(3) 165.64(11)

O(9)-Co2-O(7) 94.74(11)

O(3)-Co2-O(7) 96.63(10)

O(9)-Co2-O(2) 95.50(10)

O(3)-Co2-O(2) 88.99(10)

O(7)-Co2-O(2) 109.31(10)

O(9)-Co2-O(1W) 88.00(11)

O(3)-Co2-O(1W) 81.40(10)

O(7)-Co2-O(1W) 100.17(12)

O(2)-Co2-O(1W) 149.86(11)

Symmetry transformations used to generate equivalent atoms:

**I:** -x+4/3, -y+5/3, -z+2/3 **II:** -y+4/3, x-y+2/3, z-1/3

**III:** x-y+1/3, x-1/3, -z+2/3 **IV:** y+1/3, -x+y+2/3, -z+2/3

**V:** -x+y+2/3, -x+4/3, z+1/3

**Table S26.** Hydrogen bonds for Co2(BzOip)2(H2O)·0.19H2O [Å and °] from EtOH Batch 2 Run 2.

D-H···A d(D-H) d(H···A) d(D···A) <(DHA)

O(1W)-H(2W)···O1II 0.893(10) 2.063(19) 2.917(3) 160(4)

O(1W)-H(1W)···O5VI 0.898(10) 1.866(17) 2.735(3) 162(4)

Symmetry transformations used to generate equivalent atoms:

**I:** -x+4/3, -y+5/3, -z+2/3 **II:** -y+4/3, x-y+2/3, z-1/3

**III:** x-y+1/3, x-1/3, -z+2/3 **IV:** y+1/3, -x+y+2/3, -z+2/3

**V:** -x+y+2/3, -x+4/3, z+1/3 **VI:** y-1/3, -x+y+1/3, -z+1/3

### Co2(BzOip)2(H2O) from *i*PrOH

**Table S27.** Bond lengths [Å] and angles [°] for Co2(BzOip)2(H2O) from *i*PrOH Batch 1 Run 1.

Co1-O(7) 1.949(3)

Co1-O(1) 1.958(3)

Co1-O(8) 1.963(3)

Co1-O(4) 1.972(3)

Co1-O(2)I 2.826(3)

Co2-O(9) 2.002(3)

Co2-O(6) 2.013(3)

Co2-O(2) 2.015(3)

Co2-O(3) 2.027(3)

Co2-O(1W) 2.039(3)

Co2-O(7)VI 3.065(3)

O(7)-Co1-O(1) 108.35(12)

O(7)-Co1-O(8) 109.78(13)

O(1)-Co1-O(8) 94.75(12)

O(7)-Co1-O(4) 113.99(12)

O(1)-Co1-O(4) 109.09(12)

O(8)-Co1-O(4) 118.81(12)

O(7)-Co1-O(2)I 83.36(11)

O(1)-Co1-O(2)I 51.03(10)

O(8)-Co1-O(2)I 145.71(10)

O(4)-Co1-O(2)I 80.55(10)

O(9)-Co2-O(6) 94.90(12)

O(9)-Co2-O(2) 164.66(12)

O(6)-Co2-O(2) 97.62(12)

O(9)-Co2-O(3) 95.11(12)

O(6)-Co2-O(3) 109.81(11)

O(2)-Co2-O(3) 88.97(11)

O(9)-Co2-O(1W) 87.72(12)

O(6)-Co2-O(1W) 101.54(14)

O(2)-Co2-O(1W) 81.13(12)

O(3)-Co2-O(1W) 148.12(13)

O(9)-Co2-O(7)VI 90.98(11)

O(6)-Co2-O(7)VI 173.69(10)

O(2)-Co2-O(7)VI 76.22(10)

O(3)-Co2-O(7)VI 71.85(9)

O(1W)-Co2-O(7)VI 76.36(12)

Symmetry transformations used to generate equivalent atoms:

**I:** -x+y+4/3, -x+2/3, z-1/3 **II:** x-y+1/3, x-1/3, -z+5/3

**III:** y+1/3, -x+y+2/3, -z+5/3 **IV:** x-y, x-1, -z+2 **V:** y+1, -x+y+1, -z+2

**VI:** -y+2/3, x-y-2/3, z+1/3

**Table S28.** Hydrogen bonds for Co2(BzOip)2(H2O) [Å and °] from *i*PrOH Batch 1 Run 1.

D-H···A d(D-H) d(H···A) d(D···A) <(DHA)

O(1W)-H(1W)···O4VI 0.897(10) 2.002(14) 2.894(4) 173(6)

O(1W)-H(2W)···O5VII 0.897(10) 1.85(2) 2.731(4) 166(7)

Symmetry transformations used to generate equivalent atoms:

**I:** -x+y+4/3, -x+2/3, z-1/3 **II:** x-y+1/3, x-1/3, -z+5/3

**III:** y+1/3, -x+y+2/3, -z+5/3 **IV:** x-y,x-1,-z+2 **V:** y+1, -x+y+1, -z+2

**VI:** -y+2/3, x-y-2/3, z+1/3 **VII:** -x+y+4/3, -x+2/3, z+2/3

**Table S29.** Bond lengths [Å] and angles [°] for Co2(BzOip)2(H2O) from *i*PrOH Batch 1 Run 2.

Co(1)-O(3) 1.958(3)

Co(1)-O(2) 1.964(3)

Co(1)-O(7)IV 1.969(3)

Co(1)-O(8) 1.979(2)

Co(1)-O(9) 3.036(3)

Co(2)-O(1) 2.011(3)

Co(2)-O(4) 2.019(3)

Co(2)-O(6) 2.027(3)

Co(2)-O(9) 2.033(3)

Co(2)-O(1W) 2.039(3)

Co(2)-O(3)V 3.076(3)

O(3)-Co(1)-O(2) 109.65(13)

O(3)-Co(1)-O(7)IV 108.54(11)

O(2)-Co(1)-O(7)IV 94.62(11)

O(3)-Co(1)-O(8) 113.87(12)

O(2)-Co(1)-O(8) 119.00(11)

O(7)IV-Co(1)-O(8) 109.12(11)

O(3)-Co(1)-O(9) 109.76(9)

O(2)-Co(1)-O(9) 79.18(9)

O(7)IV-Co(1)-O(9) 141.03(9)

O(8)-Co(1)-O(9) 47.21(9)

O(1)-Co(2)-O(4) 95.03(12)

O(1)-Co(2)-O(6) 164.74(12)

O(4)-Co(2)-O(6) 97.36(11)

O(1)-Co(2)-O(9) 95.18(11)

O(4)-Co(2)-O(9) 109.60(11)

O(6)-Co(2)-O(9) 89.03(11)

O(1)-Co(2)-O(1W) 87.74(12)

O(4)-Co(2)-O(1W) 101.59(13)

O(6)-Co(2)-O(1W) 81.09(11)

O(9)-Co(2)-O(1W) 148.25(12)

O(1)-Co(2)-O(3)V 90.90(10)

O(4)-Co(2)-O(3)V 173.64(9)

O(6)-Co(2)-O(3)V 76.42(9)

O(9)-Co(2)-O(3)V 72.04(9)

O(1W)-Co(2)-O(3)V 76.31(11)

Symmetry transformations used to generate equivalent atoms:

**I:** y-1/3, -x+y+1/3, -z+1/3 **II:** x-y+2/3, x+1/3, -z+1/3

**III:** -x+5/3, -y+7/3, -z+1/3 **IV:** -x+y+1/3, -x+5/3, z-1/3

**V:** -y+5/3, x-y+4/3, z+1/3

**Table S30.** Hydrogen bonds for Co2(BzOip)2(H2O) [Å and °] from *i*PrOH Batch 1 Run 2.

D-H···A d(D-H) d(H···A) d(D···A) <(DHA)

O(1W)-H(2W)···O(8)V 0.899(10) 2.021(15) 2.906(4) 168(5)

O(1W)-H(1W)···O(10)V 0.897(10) 1.873(16) 2.748(4) 165(4)

Symmetry transformations used to generate equivalent atoms:

**I:** y-1/3, -x+y+1/3, -z+1/3 **II:** x-y+2/3, x+1/3, -z+1/3

**III:** -x+5/3, -y+7/3, -z+1/3 **IV:** -x+y+1/3, -x+5/3, z-1/3

**V:** -y+5/3, x-y+4/3, z+1/3

**Table S31.** Bond lengths [Å] and angles [°] for Co2(BzOip)2(H2O) from *i*PrOH Batch 1 Run 3.

Co(1)-O(2) 1.955(3)

Co(1)-O(4) 1.963(3)

Co(1)-O(9) 1.966(3)

Co(1)-O(6) 1.978(3)

Co(1)-O(7)III 3.034(3)

Co(2)-O(3) 2.008(3)

Co(2)-O(1) 2.014(3)

Co(2)-O(7) 2.025(3)

Co(2)-O(8) 2.026(3)

Co(2)-O(1W) 2.035(3)

Co(2)-O(2) 3.060(4)

O(2)-Co(1)-O(4) 109.77(16)

O(2)-Co(1)-O(9) 108.37(14)

O(4)-Co(1)-O(9) 94.66(14)

O(2)-Co(1)-O(6) 114.03(15)

O(4)-Co(1)-O(6) 118.81(14)

O(9)-Co(1)-O(6) 109.10(14)

O(2)-Co(1)-O(7)III 109.76(12)

O(4)-Co(1)-O(7)III 79.23(12)

O(9)-Co(1)-O(7)III 141.18(12)

O(6)-Co(1)-O(7)III 47.12(11)

O(3)-Co(2)-O(1) 94.98(15)

O(3)-Co(2)-O(7) 95.17(14)

O(1)-Co(2)-O(7) 109.83(14)

O(3)-Co(2)-O(8) 165.09(15)

O(1)-Co(2)-O(8) 97.03(14)

O(7)-Co(2)-O(8) 89.05(13)

O(3)-Co(2)-O(1W) 87.83(14)

O(1)-Co(2)-O(1W) 101.11(16)

O(7)-Co(2)-O(1W) 148.48(16)

O(8)-Co(2)-O(1W) 81.22(14)

O(3)-Co(2)-O(2) 90.94(13)

O(1)-Co(2)-O(2) 173.59(12)

O(7)-Co(2)-O(2) 72.00(12)

O(8)-Co(2)-O(2) 76.75(12)

O(1W)-Co(2)-O(2) 76.60(14)

Co(1)-O(2)-Co(2) 95.27(13)

Symmetry transformations used to generate equivalent atoms:

**I:** -y+1/3, x-y-1/3, z-1/3 **II:** x-y+1/3, x-1/3, -z+2/3

**III:** -x+y+2/3, -x+1/3, z+1/3 **IV:** y+1/3, -x+y+2/3, -z+2/3

**Table S32.** Hydrogen bonds for Co2(BzOip)2(H2O) [Å and °] from *i*PrOH Batch 1 Run 3.

D-H···A d(D-H) d(H···A) d(D···A) <(DHA)

O(1W)-H(2W)···O(6) 0.898(10) 2.026(17) 2.908(5) 167(5)

O(1W)-H(1W)···O(10)V 0.897(10) 1.87(2) 2.737(5) 163(5)

Symmetry transformations used to generate equivalent atoms:

**I:** -y+1/3, x-y-1/3, z-1/3 **II:** x-y+1/3, x-1/3, -z+2/3

**III:** -x+y+2/3, -x+1/3, z+1/3 **IV:** y+1/3, -x+y+2/3, -z+2/3

**V:** -x+1, -y, -z+1

**Table S33.** Bond lengths [Å] and angles [°] for Co2(BzOip)2(H2O) from *i*PrOH Batch 2 Run 1.

Co(1)-O(2) 1.952(2)

Co(1)-O(4) 1.962(2)

Co(1)-O(6) 1.9653(19)

Co(1)-O(8) 1.9782(19)

Co(1)-O(7)III 2.830(2)

Co(2)-O(3) 2.007(2)

Co(2)-O(1) 2.015(2)

Co(2)-O(7) 2.0246(19)

Co(2)-O(9) 2.0292(19)

Co(2)-O(1W) 2.040(2)

Co(2)-O(2)VI 3.072(2)

O(2)-Co(1)-O(4) 109.74(10)

O(2)-Co(1)-O(6) 108.56(9)

O(4)-Co(1)-O(6) 94.57(8)

O(2)-Co(1)-O(8) 113.94(9)

O(4)-Co(1)-O(8) 118.98(8)

O(6)-Co(1)-O(8) 108.98(8)

O(2)-Co(1)-O(7)III 83.58(8)

O(4)-Co(1)-O(7)III 145.51(7)

O(6)-Co(1)-O(7)III 51.01(7)

O(8)-Co(1)-O(7)III 80.42(7)

O(3)-Co(2)-O(1) 94.98(9)

O(3)-Co(2)-O(7) 164.64(9)

O(1)-Co(2)-O(7) 97.51(8)

O(3)-Co(2)-O(9) 95.19(8)

O(1)-Co(2)-O(9) 109.70(8)

O(7)-Co(2)-O(9) 89.00(8)

O(3)-Co(2)-O(1W) 87.72(9)

O(1)-Co(2)-O(1W) 101.60(10)

O(7)-Co(2)-O(1W) 81.05(8)

O(9)-Co(2)-O(1W) 148.15(9)

O(3)-Co(2)-O(2)VI 90.97(8)

O(1)-Co(2)-O(2)VI 173.64(7)

O(7)-Co(2)-O(2)VI 76.26(7)

O(9)-Co(2)-O(2)VI 71.90(7)

O(1W)-Co(2)-O(2)VI 76.35(8)

Symmetry transformations used to generate equivalent atoms:

**I:** y, -x+y, -z+1 **II:** x-y, x, -z+1 **III:** -y+2/3, x-y+1/3, z+1/3

**IV:** y-1/3, -x+y+1/3, -z+4/3 **V:** x-y+2/3, x+1/3, -z+4/3

**VI:** -x+y+1/3, -x+2/3, z-1/3

**Table S34.** Hydrogen bonds for Co2(BzOip)2(H2O) [Å and °] from *i*PrOH Batch 2 Run 1.

D-H···A d(D-H) d(H···A) d(D···A) <(DHA)

O(1W)-H(1W)···O(10)VII 0.896(10) 1.884(16) 2.742(3) 160(3)

O(1W)-H(2W)···O(8)VI 0.897(10) 2.023(15) 2.896(3) 164(4)

Symmetry transformations used to generate equivalent atoms:

**I:** y, -x+y, -z+1 **II:** x-y, x, -z+1 **III:** -y+2/3, x-y+1/3, z+1/3

**IV:** y-1/3, -x+y+1/3, -z+4/3 **V:** x-y+2/3, x+1/3, -z+4/3

**VI:** -x+y+1/3, -x+2/3, z-1/3 **VII:** -y+2/3, x-y+1/3, z-2/3

**Table S35.** Bond lengths [Å] and angles [°] for Co2(BzOip)2(H2O) from *i*PrOH Batch 2 Run 2.

Co(1)-O(1) 1.952(2)

Co(1)-O(3) 1.958(2)

Co(1)-O(7) 1.9614(19)

Co(1)-O(8) 1.9731(18)

Co(1)-O(6)V 2.827(2)

Co(2)-O(4) 2.003(2)

Co(2)-O(2) 2.014(2)

Co(2)-O(6) 2.0219(19)

Co(2)-O(9) 2.0272(19)

Co(2)-O(1W) 2.037(2)

Co(2)-O(1)IV 3.059(2)

O(1)-Co(1)-O(3) 109.86(10)

O(1)-Co(1)-O(7) 108.48(9)

O(3)-Co(1)-O(7) 94.66(8)

O(1)-Co(1)-O(8) 113.90(9)

O(3)-Co(1)-O(8) 118.91(8)

O(7)-Co(1)-O(8) 108.97(8)

O(1)-Co(1)-O(6)V 83.45(8)

O(3)-Co(1)-O(6)V 145.54(7)

O(7)-Co(1)-O(6)V 50.95(7)

O(8)-Co(1)-O(6)V 80.47(7)

O(4)-Co(2)-O(2) 94.96(9)

O(4)-Co(2)-O(6) 164.73(9)

O(2)-Co(2)-O(6) 97.46(8)

O(4)-Co(2)-O(9) 95.10(8)

O(2)-Co(2)-O(9) 109.59(8)

O(6)-Co(2)-O(9) 89.07(8)

O(4)-Co(2)-O(1W) 87.83(9)

O(2)-Co(2)-O(1W) 101.43(10)

O(6)-Co(2)-O(1W) 81.05(8)

O(9)-Co(2)-O(1W) 148.42(9)

O(4)-Co(2)-O(1)IV 90.87(8)

O(2)-Co(2)-O(1)IV 173.75(7)

O(6)-Co(2)-O(1)IV 76.43(7)

O(9)-Co(2)-O(1)IV 72.01(7)

O(1W)-Co(2)-O(1)IV 76.52(8)

Symmetry transformations used to generate equivalent atoms:

**I:** y+1/3, -x+y+2/3, -z+2/3 **II:** x-y+1/3, x-1/3, -z+2/3

**III:** -x+4/3, -y-1/3, -z+2/3 **IV:** -x+y+4/3, -x+2/3, z-1/3

**V:** -y+2/3, x-y-2/3, z+1/3

**Table S36.** Hydrogen bonds for Co2(BzOip)2(H2O) [Å and °] from *i*PrOH Batch 1 Run 3.

D-H···A d(D-H) d(H···A) d(D···A) <(DHA)

O(1W)-H(1W)···O(8)IV 0.888(10) 2.033(14) 2.895(3) 163(3)

O(1W)-H(2W)···O(10)VI 0.893(10) 1.875(15) 2.736(3) 161(3)

Symmetry transformations used to generate equivalent atoms:

**I:** y+1/3, -x+y+2/3, -z+2/3 **II:** x-y+1/3, x-1/3, -z+2/3

**III:** -x+4/3, -y-1/3, -z+2/3 **IV:** -x+y+4/3, -x+2/3, z-1/3

**V:** -y+2/3, x-y-2/3, z+1/3 **VI:** x-y-1/3, x-2/3, -z+1/3

## S2. PXRD Comparisons


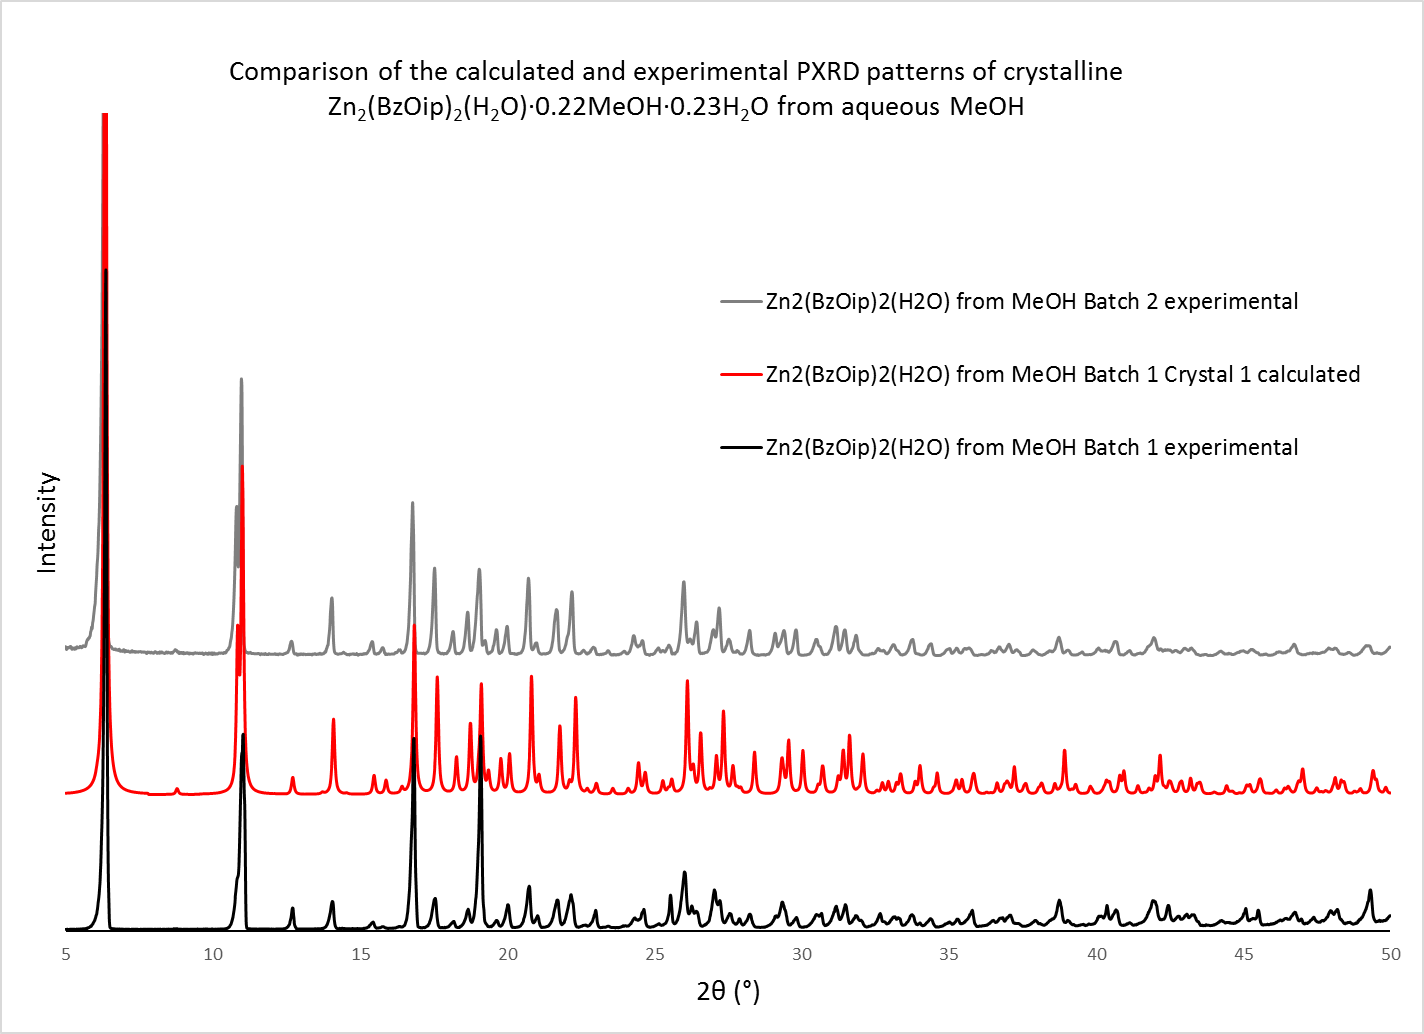


**Figure S1.** Comparison of the calculated and experimental PXRD patterns of crystalline Zn2(BzOip)2(H2O)·0.22MeOH·0.23H2O from methanol.


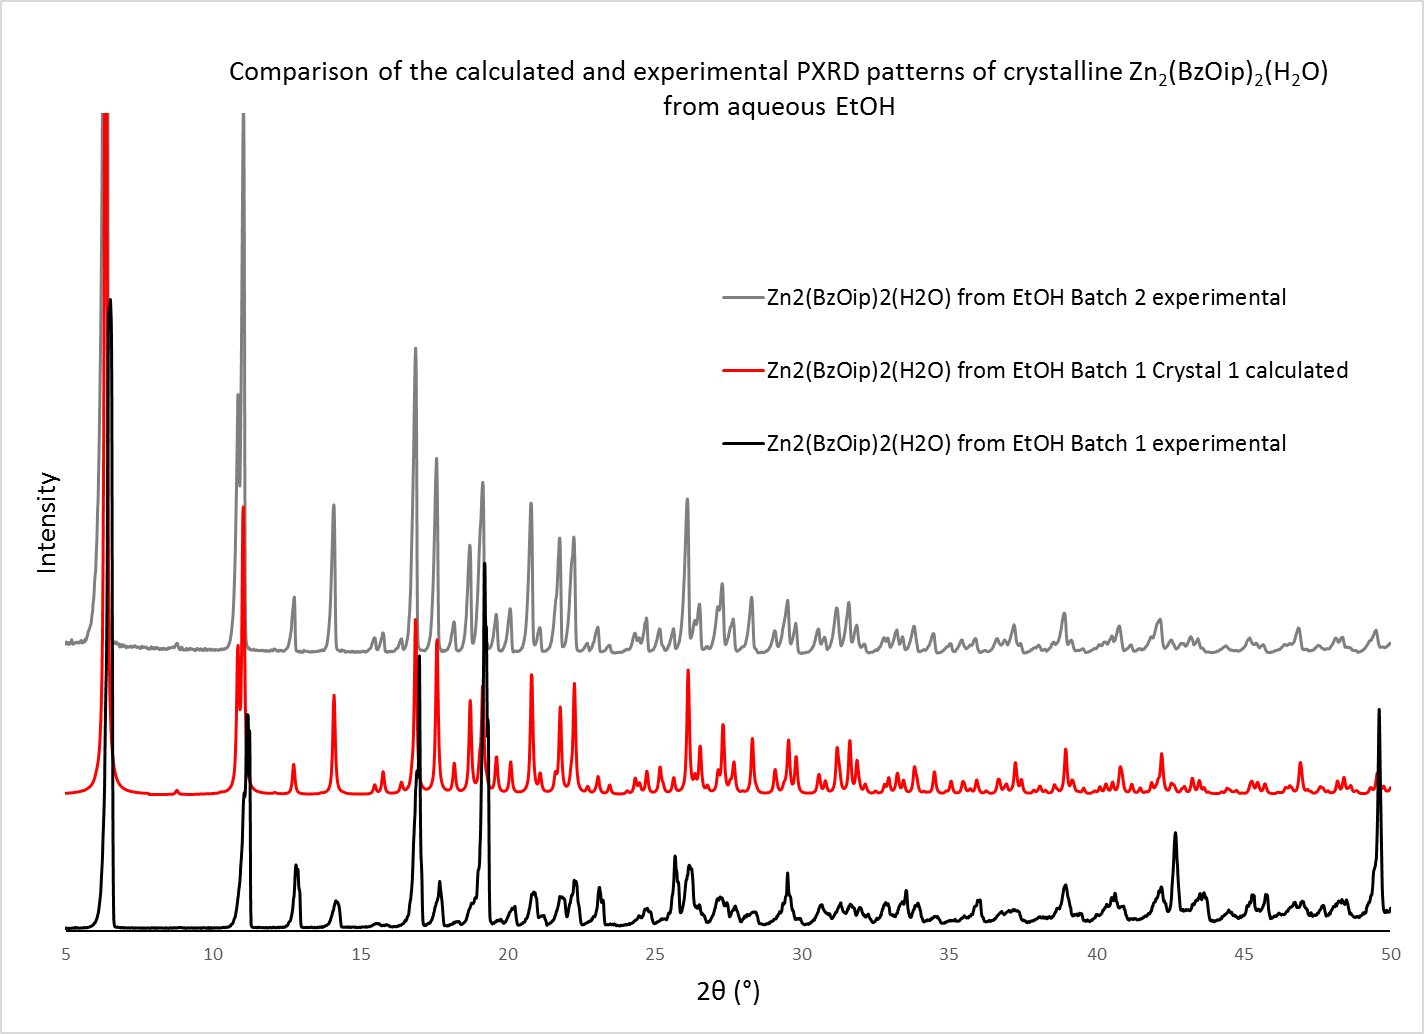


**Figure S2.** Comparison of the calculated and experimental PXRD patterns of crystalline Zn2(BzOip)2(H2O) from ethanol.


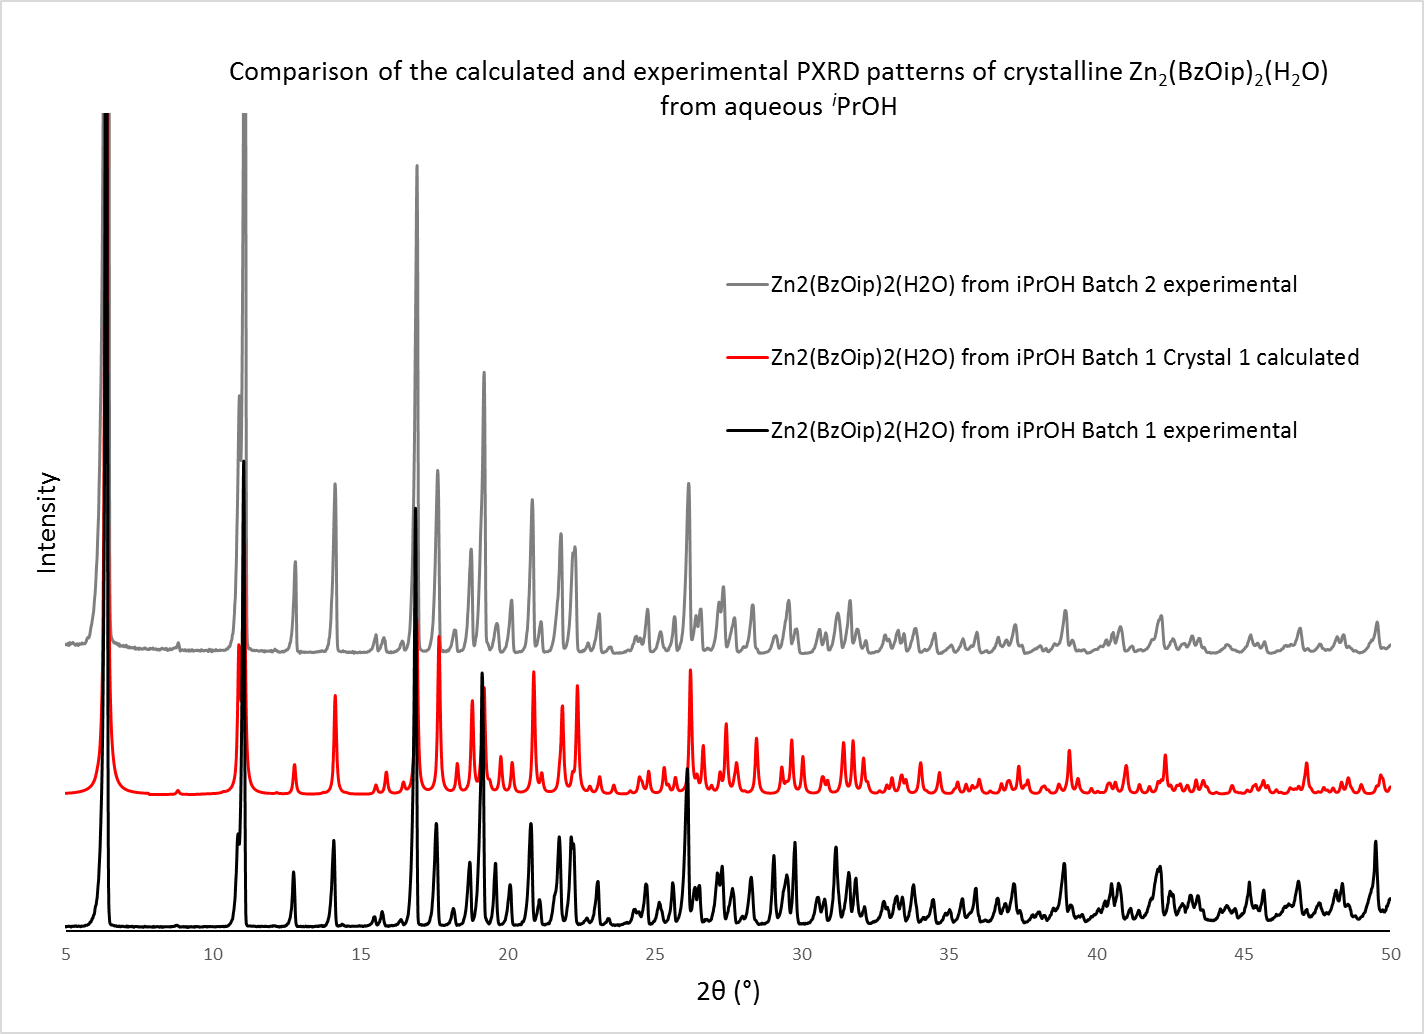


**Figure S3.** Comparison of the calculated and experimental PXRD patterns of crystalline Zn2(BzOip)2(H2O) from *iso*propanol.


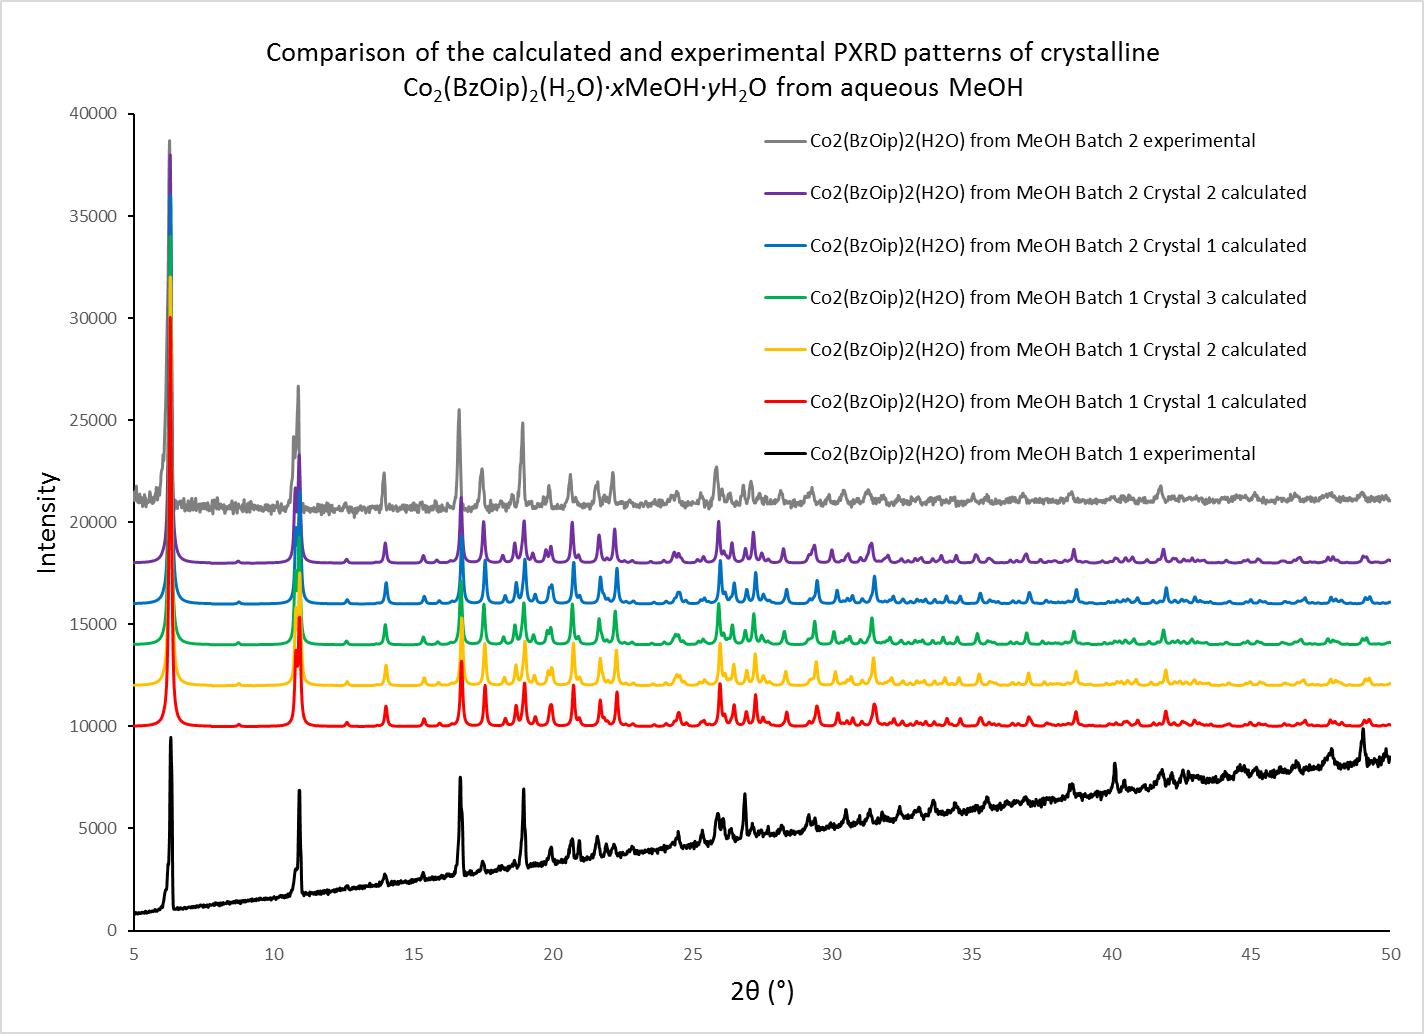


**Figure S4.** Comparison of the calculated and experimental PXRD patterns of crystalline Co2(BzOip)2(H2O)·*x*MeOH·*y*H2O from methanol.


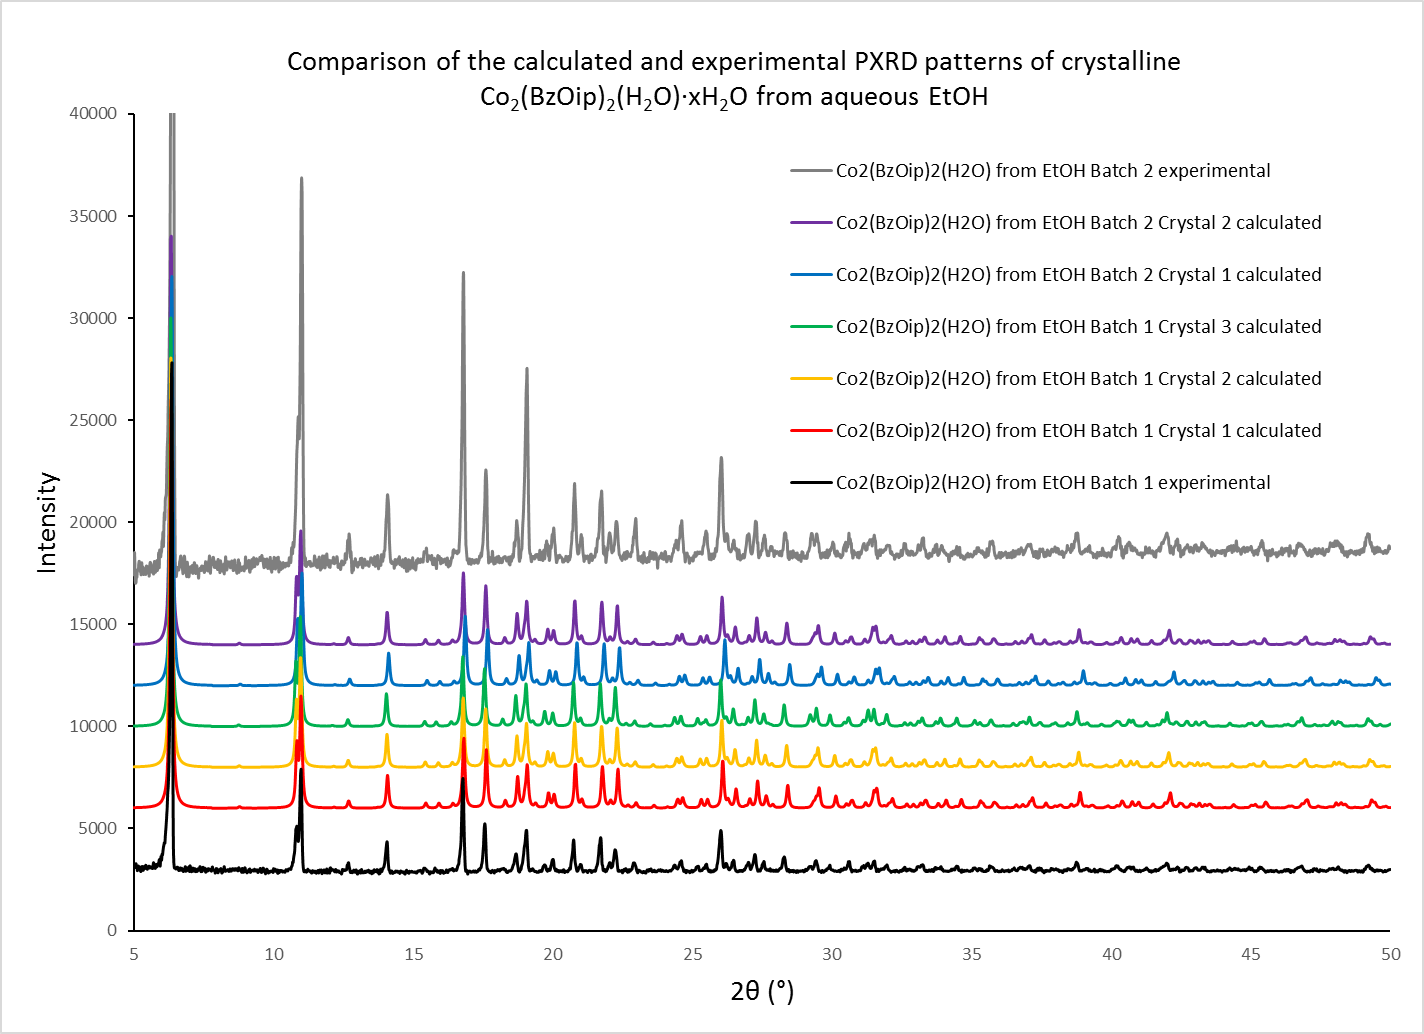


**Figure S5.** Comparison of the calculated and experimental PXRD patterns of crystalline Co2(BzOip)2(H2O)·*x*H2O from ethanol.


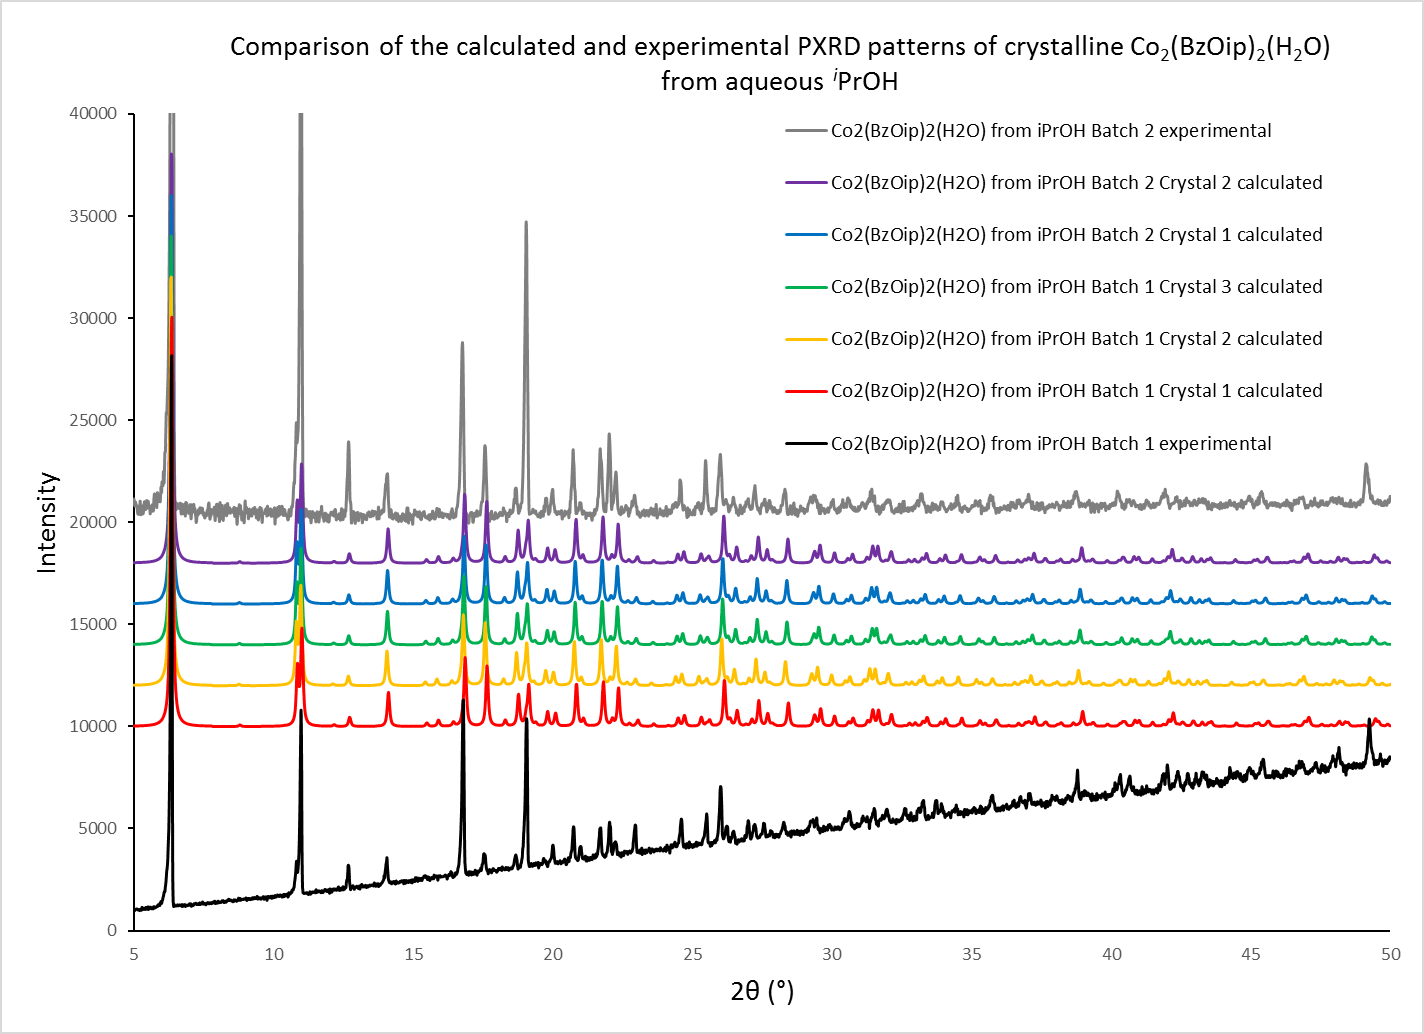


**Figure S6.** Comparison of the calculated and experimental PXRD patterns of crystalline Co2(BzOip)2(H2O) from *iso*propanol.

## S3. TGA


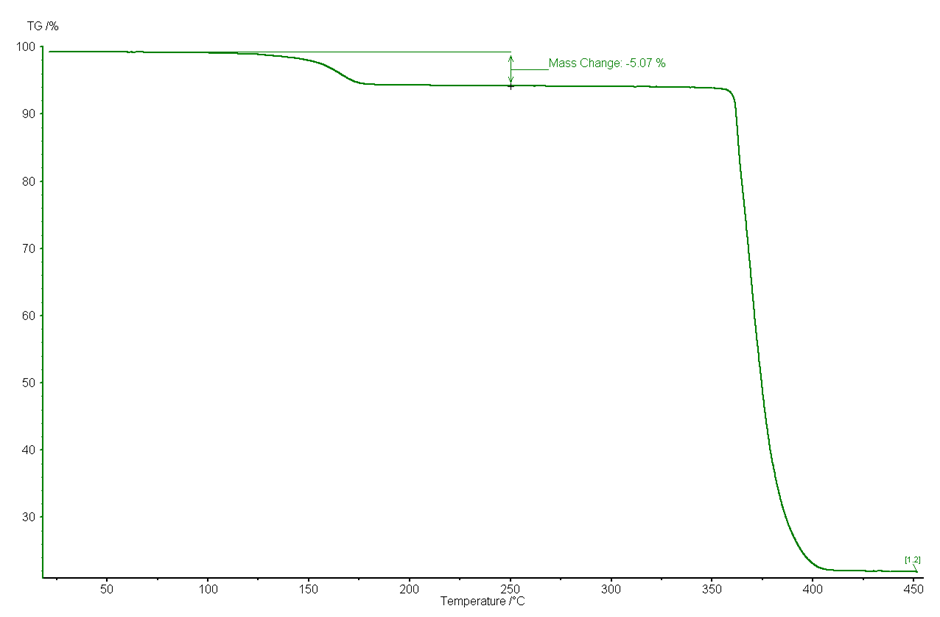


**Figure S7.** TGA trace of Co2(BzOip)2(H2O)·*x*MeOH·*y*H2O from MeOH. This mass loss (5.07%) approximately corresponds to the loss of 1.55 water molecules and 0.23 methanol molecules (5.09%) including the coordinated water molecule. This assignment is arbitrary, and assumes that the mass difference between the loss of 0.23 methanol molecules and 0.22 water molecules (4.27%) is due to the presence and loss of additional surface water rather than additional surface methanol.


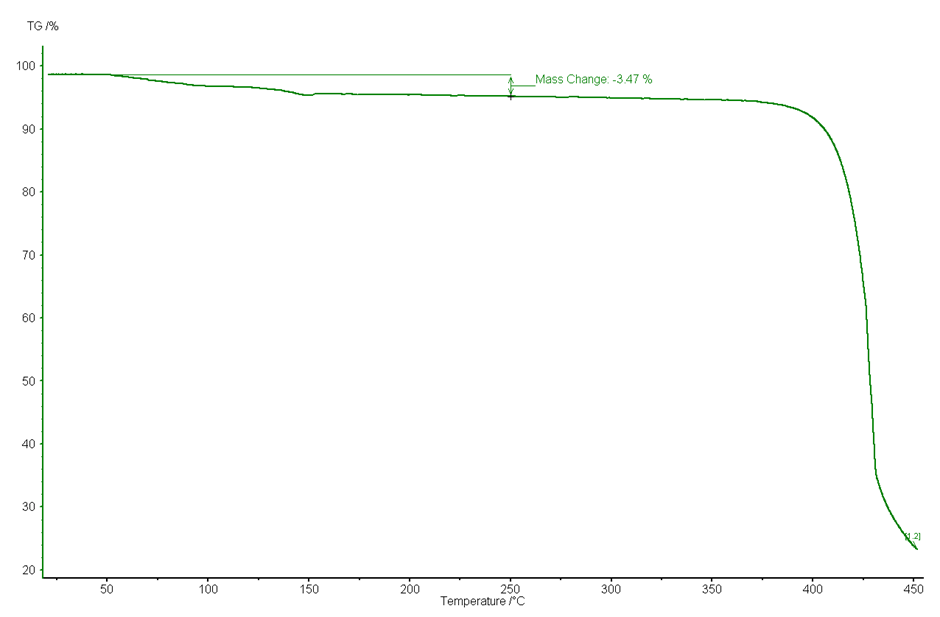


**Figure S8.** TGA trace of Zn2(BzOip)2(H2O)·*x*MeOH·*y*H2O from MeOH. This mass loss (3.47%) approximately corresponds to the loss of 1.33 water molecules (3.45%), or 1 water molecule and 0.2 methanol molecules (3.51%) including the coordinated water molecule. These value are arbitrary.


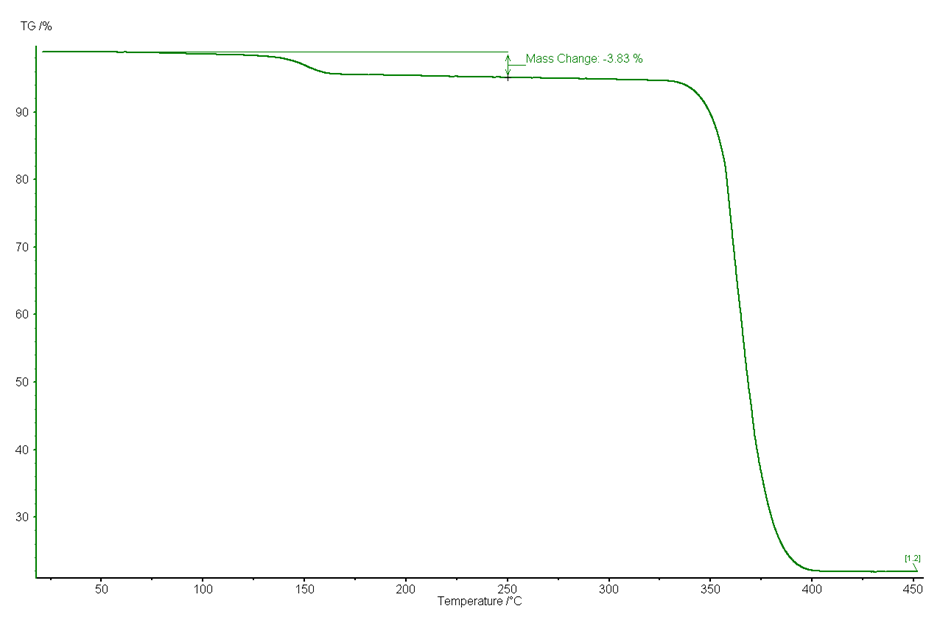


**Figure S9.** TGA trace of Co2(BzOip)2(H2O)·*x*H2O from EtOH. This mass loss (3.83%) approximately corresponds to the loss of 1.45 water molecules (3.82%) including the coordinated water molecule.


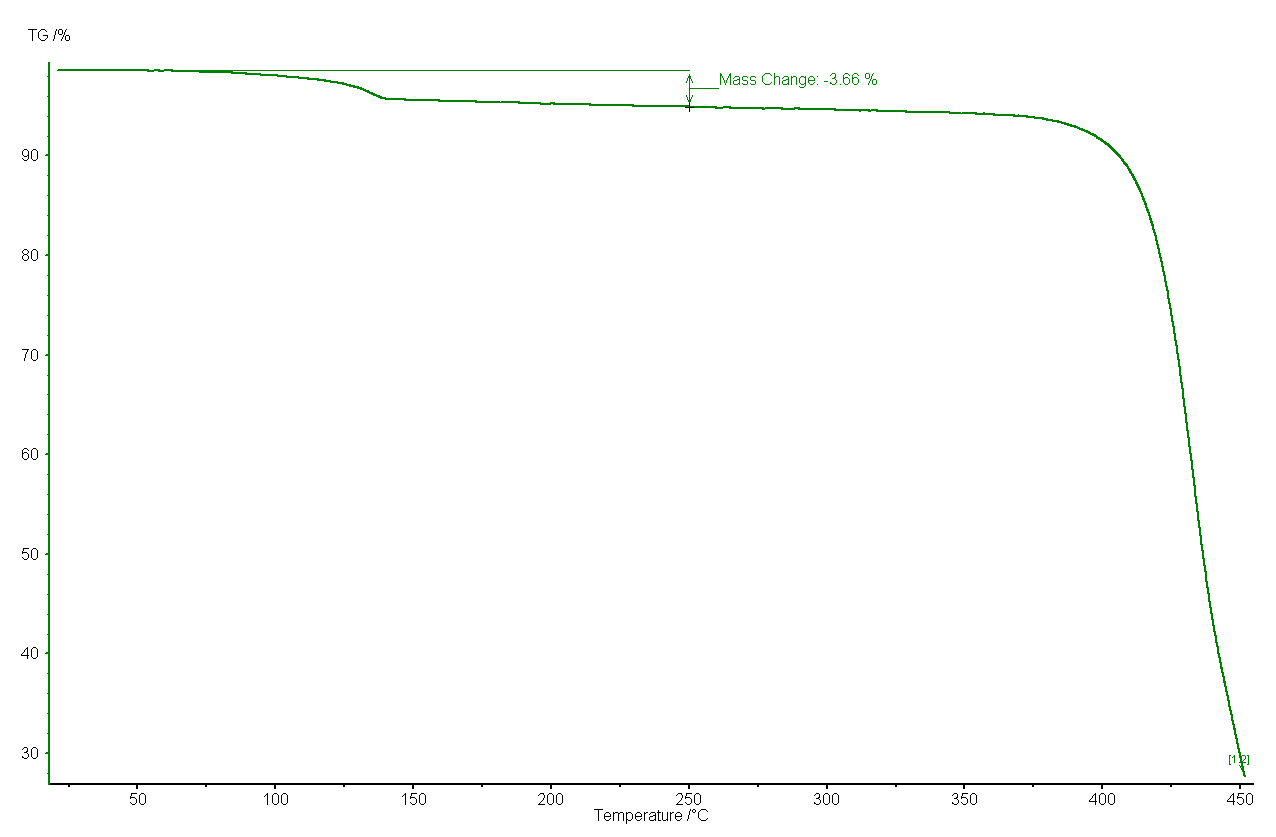


**Figure S10.** TGA trace of Zn2(BzOip)2(H2O) from EtOH. This mass loss (3.66%) approximately corresponds to the loss of 1.4 water molecule (3.62%), including the coordinated water molecule.


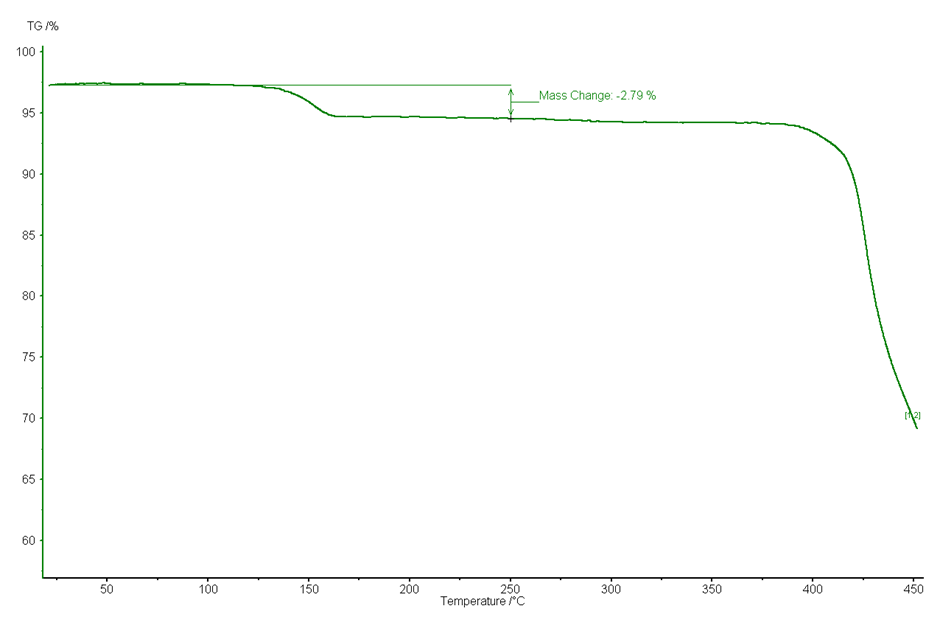


**Figure S11.** TGA trace of Co2(BzOip)2(H2O) from *i*PrOH. This mass loss (2.79%) approximately corresponds to the loss of 1 water molecule (2.66%), including the coordinated water molecule.


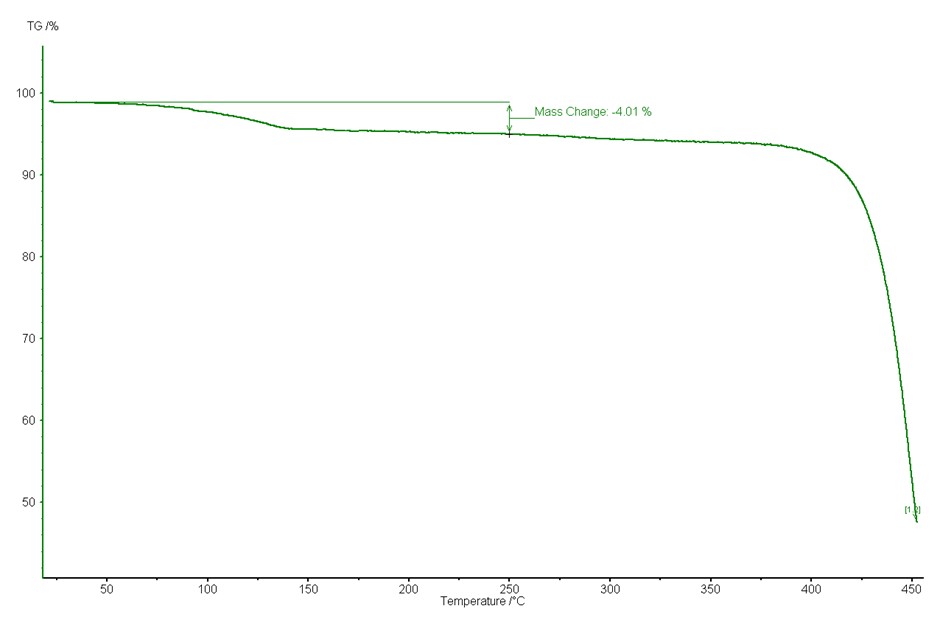


**Figure S12.** TGA trace of Zn2(BzOip)2(H2O) from *i*PrOH. This mass loss (4.01%) approximately corresponds to the loss of 1.55 water molecules (4.00%), including the coordinated water molecule.
